# Supplementary material
Source: publisher figshare collection journal article supplement (https://acs.figshare.com/ndownloader/files/15144212)
Supplement: Supplementary file 1 [file 15144212]

**Codelivery Nanosystem Targeting the Deep Microenvironment of Pancreatic Cancer**

*Xinli Chen<sup>†</sup>, Wenxi Zhou<sup>†</sup>, Chen Liang<sup>//, ▽</sup>, Si Shi<sup>//, ▽</sup>, Xianjun Yu<sup>//, ▽</sup>, Qinqun Chen<sup>†</sup>, Tao Sun<sup>†</sup>, Yifei Lu<sup>†</sup>, Yujie Zhang<sup>†</sup>, Qin Guo<sup>†</sup>, Chao Li<sup>†</sup>, Yu Zhang<sup>†</sup>, ,Chen Jiang<sup>†\*</sup>*

<sup>†</sup> Key Laboratory of Smart Drug Delivery

Ministry of Education

State Key Laboratory of Medical Neurobiology

Research Center on Aging and Medicine

Department of Pharmaceutics

School of Pharmacy

Fudan University

Shanghai 201203, China

E-mail: jiangchen@shmu.edu.cn

<sup>//</sup> Department of Pancreatic and Hepatobiliary Surgery,

Fudan University Shanghai Cancer Center,

270 Dongan Road,

Shanghai 200032, China

<sup>▽</sup> Department of Oncology,

Shanghai Medical College,

Fudan University,

Shanghai 200032, China

## Experimental section

**Materials.** uPAR targeting peptide AE105 (C-D-Cha-F-s-r-Y-L-W-S) was purchased from Chinapeptide (Shanghai, China).  $\alpha$ -Methoxy- $\omega$ -amino-poly (ethylene glycol) (mPEG-NH<sub>2</sub>, MW 5000) and maleimide- $\omega$ -amino-poly(ethylene glycol) (Mal-PEG-NH<sub>2</sub>, MW 5000) were purchased from Jenkem Biotech (Beijing, China). 4-(Dimethylamino) pyridine, N, N-Dicyclohexylcarbodiimide, 3, 5-dimethyl-1-pyrazolylformamidinium nitrate, Lysine-N-carboxyanhydride and Boc-L-ornithine were purchased from Aladdin Chemistry (Shanghai, China). Triphosgene was purchased from Tokyo Chemical Industry (Shanghai, China). BODIPY-NHS (Ex/Em : 650/665) were purchased from Molecular Probes (ThermoFisher, USA). Paclitaxel (MB1178), gemcitabine (MB1113) and D-Luciferin potassium (MB1834) were purchased from Dalian Meilun Biotechnology Co., Ltd (Dalian, China). Phosphorylated gemcitabine was a gift from Dr. Qingbing Wang (Ruijin Hospital, Shanghai, China). 3-(4, 5-dimethyl-2-thiazolyl)-2, 5-diphenyl-2H tetrazolium bromide (MTT) was purchased from Sigma-Aldrich (St. Louis, USA). Antibodies against cell surface markers for flow cytometry (fluorescent-activated cell sorting) assay were purchased from eBioscience (CA, USA) and Abcam (Cambridge, England). One step TdT-mediated dUTP Nick-End Labeling (TUNEL) apoptosis assay kit and annexin V-FITC/PI apoptosis detection kit were purchased from KeyGEN BioTECH (Nanjing, China). Other reagents without specified explanation were purchased from Sinopharm Chemical Reagent (Shanghai, China).

**Cells lines.** MiaPaCa-2 cells, purchased from American Type Culture Collection (ATCC), highly metastatic human pancreatic cancer epithelial cell, are applied for the construction of pancreatic ductal adenocarcinoma model in nude mice. PANC02-luci cells are gift from Prof. Zhigang Zhang

at Shanghai Cancer Institute. It was used for the manufacture of mouse pancreatic ductal cancer model in the C57BL/6 mice. MiaPaCa-2 and PANC-02 cells were carefully maintained in high glucose DMEM medium supplemented with 10% heat-inactivated FBS and 10 mM 4-(2-hydroxyethyl)-1-piperazineethanesulfonic acid (HEPES), 100 U/mL penicillin and 100 µg/mL streptomycin at 37°C and 5% CO<sub>2</sub>.

**Preparation of HSA-PTX.** HSA-PTX nanoparticle was prepared according to previous precedures.<sup>1-2</sup> Briefly, 20 mg of PTX dissolved in 20 mL of ethanol was added into 1 mL HSA solution (20 mg/mL) drop-wisely. The suspension was stirred at room temperature for 30 min and sonicated for 5 min. Then, the mixture was dialyzed (MWCO: 12 – 14 kDa) overnight to remove residual free PTX and ethanol.

**Synthesis of Orn-(Boc)-NCA.** Boc-L-ornithine NCA was synthesized according to previous procedures.<sup>3</sup> Briefly, boc-L-ornithine (1g, 4.31mmol) was added to flask with anhydrous tetrahydrofuran (THF, 34.3mL). A solution of triphosgene (0.47g, 1.6mmol) in anhydrous THF (6.9 mL) was added to the slurry. The mixture was heated to 50°C for 1h before cooled to ambient temperature. The insoluble solid was removed by filtration washing with 10 mL anhydrous THF. The filtrate was concentrated by vacuum distillation to 10ml and the solvent was switched to n-hexane (10mL). The resulting slurry was filtrated and dried to give a white crystalline product.

**Synthesis of Lys-(Cbz)-NCA.** Lysine-N-Carboxyanhydride were synthesized according to previous procedures.<sup>4</sup> Briefly, lysine-N-Carboxyanhydride (3 g, 10.7 mmol) and triphosgene (1.27 g, 4.28

mmol) was added to flask with anhydrous THF (30 mL). The mixture was heated to 50°C for 3h until the solution become clear. The insoluble solid was removed by filtration. The filtrate was added to the cooled n-hexane. The resulting slurry was filtrated and dried to give a white crystalline product.

**Synthesis of PEG-pOrn<sub>15</sub>(Boc)-pLys<sub>10</sub>(Cbz).** CH<sub>3</sub>O-PEG-NH<sub>2</sub> (500 mg, 100 μmol, MW = 5000) and Orn-(Boc)-NCA (390 mg, 1.5 mmol) were mixed in the 5 mL DMF and reacted at 50 °C under nitrogen. After 48 h, Lys-(Cbz)-NCA (306 mg, 1.0 mmol) in 5 mL DMF was added to the reaction mixture, and the reaction was maintained for another 48 h. The unreacted materials were removed by dialysis for 24 h, followed by freeze-drying.

**Synthesis of PEG-pOrn<sub>15</sub>-pLys<sub>10</sub>(Cbz):** PEG-pOrn<sub>15</sub>(Boc)-pLys<sub>10</sub>(Cbz) (600 mg, 52 μmol) was dissolved in dichloromethane (35 mg/mL polymer). Trifluoroacetic acid was added to the solution (1:1 dichloromethane:trifluoroacetic acid by volume). The reaction continued for 20 min at room temperature. The deprotected polymer was obtained by dialysis in deionized water for 48 h and lyophilization.

**Synthesis of AE105-PEG-pOrn(Boc)<sub>15</sub>-pLys(CBZ)<sub>10</sub>.** AE105 peptide (152 mg, 110 μmol) and Mal-PEG-pOrn(Boc)<sub>15</sub>-pLys(CBZ)<sub>10</sub> (1.14 g, 100 μM) were mixed in the 5 mL anhydrous dimethyl formamide (DMF) and reacted for 2 h at room temperature. The unreacted materials were removed by dialysis (MW = 3500) for 24h, followed by freeze-drying.

**Synthesis of PEG-pArg<sub>15</sub>-pLys<sub>10</sub>(Cbz).** PEG-pArg<sub>15</sub>-pLys<sub>10</sub>(Cbz) was prepared by the

guanidization of the obtained PEG-pOrn<sub>15</sub>-pLys<sub>10</sub> (Cbz) with 3,5-dimethyl-1-pyrazolylformamidinium nitrate. PEG-pOrn<sub>15</sub>-pLys<sub>10</sub> (Cbz) (500 mg, 50  $\mu$ mol) and 3,5-dimethyl-1-pyrazolylformamidinium nitrate (262 mg, 1.3 mmol) were dissolved in 15 mL deionized water, then the pH of the solution was adjusted to 9.3 with 1 M sodium hydroxide. The mixture was reacted at 37°C for 48 h, and then dialyzed against deionized water for another 48 h. The solution was freeze-dried to get the PEG-pArg<sub>15</sub>-pLys<sub>10</sub> (Cbz) in white powder.

**Synthesis of PEG-pArg<sub>15</sub>-pLys<sub>10</sub>.** The deprotected of PEG-pArg<sub>15</sub>-pLys<sub>10</sub> (Cbz) was performed by adding the polymer (500 mg, 47  $\mu$ mol) with TFA (5 mL) and HBr/HOAc (0.25 mL) to remove the Cbz groups. The reaction continued for 0.5 h followed by dialysis in deionized water and freeze-drying.

**Synthesis of 2-propionic-3-methylmaleic anhydride (CDM).** Sodium hydride (164 mg, 6.84 mmol) and triethyl-2-phosphonopropionate (2.02 g, 8.48 mmol) were added sequentially to 14 mL of anhydrous THF on ice. The suspension was stirred on ice until the completion of hydrogen gas generation. Dimethyl-2-oxoglurate (1.00 g, 5.71 mmol) was added and stirred for 30 min. Then, 21 mL of saturated ammonium chloride aqueous solution was added, followed by extraction with diethyl ether. Following solvent evaporation, the crude product was purified by silica gel column chromatography (diethyl ether/n-hexane = 2/1, R<sub>f</sub> = 0.6). The obtained yellow-colored oil was dissolved in 25 mL of ethanol and mixed with 15 mL of 2 M sodium hydroxide solution. The mixture was refluxed for 1 h and cooled to room temperature. Ethanol was removed by evaporation. 1 M hydrochloric acid was added to adjust the pH to 2, followed by extraction with ethyl acetate. CDM

was collected by recrystallization from the mixture of THF and n-hexane as white crystals.

**Synthesis of PTX-CDM.** DCC (37.5 mg, 0.182 mmol) was dissolved in 200  $\mu$ L of DMF, and CDM (30.5 mg, 0.166 mmol) was dissolved in 100  $\mu$ L of DMF. Both solutions were mixed together and cooled for 20 min to -18 °C. Then, a solution of PTX (100 mg, 0.117 mmol) and DMAP (14 mg, 0.117 mmol) in 300  $\mu$ L of DMF was added. The reaction proceeded at 4°C for 20 h. The product was purified by silica gel column (ethyl acetate:hexane = 2:1).

**Synthesis of PEG-pArg<sub>15</sub>-pLys<sub>10</sub>-CDM-PTX.** PEG-pArg<sub>15</sub>-pLys<sub>10</sub> (200 mg, 21.6  $\mu$ mol), PTX-CDM (110 mg, 107.8  $\mu$ mol) and N, N-Diisopropylethylamine (DIPEA, 107.8  $\mu$ mol) were dissolved in 5 mL DMF. The solution was stirred for 12 h at room temperature. The product was dialyzed against DMF for 24h and deionized water for 24 hours followed by freeze-drying.

**Preparation and characterization of micelles.** Different ratios of PEG-pOrn<sub>15</sub>-pLys<sub>10</sub>-PTX<sub>4</sub> (RKP) and AE105-PEG-pOrn<sub>15</sub>-pLys<sub>10</sub>-PTX<sub>4</sub> (T-RKP) were dissolved in DMF (10 mg/mL) then sealed in a dialysis bag (diameter = 18 mm, MWCO = 5000). Upon a true solution was formed, the mixture was dialyzed in PBS (pH = 8.0) for 12 h and to obtain RKP and T-RKP micelle solution with obvious opalescence. 5 mg of phosphorylated gemcitabine (p-GEM) was added into the micelle and vibrated for 2 min. The unbound phosphorylated gemcitabine by dialysis in PBS (pH = 8.0) for 12 h. Micelles for TEM and DLS were filtered through a 0.22  $\mu$ m cellulose acetate filter. Size and PDI of the freshly prepared micelles were measured by dynamic light scattering (DLS) (Zetasizer Nano-ZS, Malvern, U.K.). The morphology of the micelles were photographed by transmission electron microscope

(TEM, Tecnai G2 spirit Biotwin, FEI).

**pH-sensitive drug release of the micelles.** HPLC was used to evaluate the drug release. The trigger was set with PBS of pH 6.5 or 7.4 at 37 °C. 300 µL freshly prepared T-RKP micellar solution was sealed into a dialysis bag (MWCO = 2000) against 25 mL 0.1% Tween-80 containing PBS buffer. The PTX or p-GEM release was monitored by HPLC and measured in triplicate at certain time points during 24h.

**Cellular uptake.** MiaPaCa-2 cells were seeded with a density of  $1 \times 10^5$  per well in 6 well plates, incubated at 37 °C for 72 h, and monitored under microscope until with a 80~90 % confluency and similar morphology. The cells were then cultured with BODIPY labelled RKP with different percentage of AE105 (0, 10, 20, 40 and 80%) in the DMEM medium at 37 °C for 2 h. The unbound micelles were washed thrice with D-glucose-free Hank's, visualized by fluoresce microscope (Leica, Wetzlar, Germany).

**Biodistribution study *in vivo* and *ex vivo*.** Targeting study was carried out on tumor-bearing nude mice 10 days post implantation with pancreatic tumor. T-RKP and RKP (5 mg/kg of BODIPY) were intravenously injected into the tumor-bearing mice. The *in vivo* biodistribution of micelles at various time points was traced and visualized by Xenogen IVIS spectrum CT (Perkin Elmer Inc., Waltham, Massachusetts, USA). For the section observation, the mice were anaesthetized, perfused with 4% (v/v) paraformaldehyde aqueous solution and executed by the decapitation method. The tumor sections were excised, immersed in 4% (v/v) paraformaldehyde aqueous solution (12 h), and

embedded in the OCT medium (Sakura, Torrance, CA, USA) at -80 °C. Frozen slices of tumor tissues were stained with an uPAR antibody and DAPI. The photograph was obtained on a cryotome Cryostat (Leica, CM 1900, Wetzlar, Germany).

**Pharmacokinetics study.** To investigate *in vivo* pharmacokinetics (PK) of RKP and T-RKP micelles, healthy female SD rats were fast for 18 h before experiment. The rats were randomly divided into three groups (n = 5) and intravenously injected with HSA-PTX plus GEM, RKP and T-RKP micelles (10 mg PTX/kg equiv.) via tail vein, respectively. At 0.25, 0.5, 1, 2, 4, 8, 12 and 24 h, a blood sample (0.5 mL) was collected into heparinized tube and centrifuged at 3500 rpm for 10 min. For the determination of PTX concentration, each sample was taken 100 µL of supernatant and 10 µL of diazepam (5 µg/mL) was added as an internal standard. Then, 100 µL of PBS (pH = 5.5) was added to each sample and shaken 24 h on the air bath at 37 °C, 100 rpm. Then 100 µL of acetonitrile was added to each sample, followed by vortex and centrifugation at 10000 rpm for 5 min to collect the supernatant. The injection volume was 20 µL of each sample for HPLC analysis (Column: Agilent C18, 4.6\*250 mm, 5 mm; Detection wavelength: 227 nm; Mobile phase:ACN: H2O = 60:40; Flow rate: 1 mL/min).

For the determination of GEM concentration, each sample was taken 100 µL of supernatant and 10 µL of doxifluridine (5 µg/mL) was added as an internal standard. Then 100 µL of PBS (pH=5.5) was added to each sample and shaken 24 h on the air bath at 37 °C, 100 rpm. Then 100 µL of ACN was added to each sample, followed by vortex and centrifugation at 10000 rpm for 5 min to collect the supernatant. The injection volume was 20 µL of each sample for HPLC analysis (Column: Agilent C18, 4.6\*250 mm, 5 mm; Detection wavelength: 268 nm; Mobile phase:Ammonium acetate



(40mM) : ACN = 97:3; Flow rate: 1 mL/min).

***In vitro* antitumor efficacy.** MTT assay was used to evaluate the *in vitro* antitumor efficacy. MiaPaCa-2 and PANC02 cells were seeded in 96-well plates at a density of  $1 \times 10^3$  cells/well and routinely maintained until reaching a confluence of 80~90%. The cells were treated with HSA-PTX, GEM, HSA-PTX plus GEM, RKP and T-RKP at various concentrations for 48h. Afterwards, the medium was removed and cells were washed thrice with PBS before 100  $\mu$ L MTT solution (0.5 mg/mL) was added and incubated for 4 h. The MTT was removed and the cells were added with 100  $\mu$ L DMSO to dissolve the formazan crystal for 15 min. The absorbance of formazan was read at 570 nm by dual wavelength detection using a Multiskan MK3 microplate reader (Thermo Scientific, Waltham, Massachusetts, USA).

**Apoptosis assay.** The *in vitro* apoptosis was evaluated by Annexin-V/PI assay. MiaPaCa-2 or PANC02 cells were seeded in 6-well plate at a density of  $1 \times 10^5$  per well and cultured for 24 h. The cells were treated with saline, HSA-PTX, GEM, HSA-PTX plus GEM, RKP and T-RKP for 48 hours. Afterwards, the medium was removed and cells were collected and centrifuged at 2000 rpm for 5 min, washed twice with cold PBS, resuspended in binding buffer and stained with Annexin V-FITC/PI according to the instructions. Apoptotic cells were evaluated and calculated on a CytoFLEX S (Beckman Coulter, Inc.) or fluorescence microscope (Leica, Wetzlar, Germany).

***In vivo* antitumor efficacy.** 14 days post the implantation with PANC02 xenograft, C57BL/6 mice were randomly divided into six group (n = 8) based on the bioluminescence signal showed by the

IVIS system that reflects the initial tumor size (the IVIS luminescence intensity is among  $8 \sim 12 \times 10^5$ ). The mice were administrated with saline, HSA-PTX, GEM, HSA-PTX plus GEM, RKP, T-RKP with an equal dose of 5 mg/kg GEM on the 0th, 3rd, 6th, 9th, 12th and 15th day. The body weight and tumor volume of mice was recorded every other day. The growth of the tumor was carefully monitored by the IVIS system.

***Ex vivo* analysis of tumoral T cells.** To study the immune cells in the tumor, tumors were harvested from mice in different groups and stained with anti-CD45-APC (eBioscience, Clone: 30-F11, Catalog: 17-0451-82), anti-CD8-PE (eBioscience, Clone: H35-17.2, Catalog: 12-0083-82), anti-CD4-Percp-Cy5.5 (eBioscience, Clone: RM4-5, Catalog: 45-0042-82), anti-CD3-FITC (eBioscience, Clone: 17A2, Catalog: 11-0032-82), anti-CD25-PE-CY7 (eBioscience, Clone: PC61.5, Catalog: 45-0251-82), anti-FoxP3-PE (eBioscience, Clone: 236A/E7, Catalog: 12-4777-42) antibodies according to the manufacturer's protocols. Briefly, tumor tissues were cut into small pieces and homogenized with PBS (pH 7.4) containing 2% heat-inactivated fetal bovine serum. The tumor cells were stained with fluorescence-labelled antibodies after the removal of red blood cells (RBC) with the RBC. Cytotoxic T lymphocytes (CTL) and helper T cells were marked with  $CD45^+CD4^+CD8^+$  and  $CD45^+CD4^+CD8^-$ , respectively. Tregs were marked with  $CD45^+CD25^+CD4^+FoxP3^+$ . The concentration of IFN- $\gamma$  in tumor was valued by the IFN- $\gamma$  elisa kit according to the protocol.

**Confocal microscopy.** The tumors were dissected from the mice and snap frozen in OCT medium. Several 5- $\mu$ m-thick sections were cut using a cryotome and then mounted on slides. Sections were fixed in ice-cold acetone for 10 min prior to rehydration with PBS. After blocking with BSA (3%),

sections were stained with primary antibodies overnight at 4°C. Following the addition of fluorescently labelled secondary antibodies, the slides were analyzed using a confocal microscope (Leica, CM 1900, Wetzlar, Germany).

**Tumor metastasis study.** Tumor metastasis study was carried out on nude mice at 14 day post implantation with MiaPaCa-2 cells. Saline, HSA-PTX, GEM, HSA-PTX plus GEM, RKP or T-RKP was intravenously administrated into the tumor-bearing mice with an equal dose of 5 mg/kg GEM on the 0th, 3rd, 6th, 9th, 12th and 15th day. The body weight and tumor volume of mice were recorded every other day. The growth of the tumor was carefully monitored by the IVIS system. The tumors were dissected from the mice after the treatment. The slices were snap frozen in OCT medium for TUNEL staining and immunofluorescence staining of  $\alpha$ -SMA, IBA1 and VEGF. The tumor, liver, lung, spleen and heart were harvested to evaluate the tumor metastasis foci. The liver sections were stained with H&E staining, masson staining and CK-19 immunohistochemistry to indicate tumor metastasis site.

**Real-Time Quantitative RT-PCR Analysis.** For quantitative evaluation of RNA levels of associated proteins, total RNA from the tumor of different groups was isolated using Trizol LS reagent (Invitrogen, USA) according to the manufacturer's instructions. The RT-PCR analysis was performed by Wuhan Servicebio Co. Ltd. Primer sequence: GAPDH-F: 5' CATGAGAAGTATGACAACAGCCT; GAPDH-R: 5' AGTCCTTCCACGATACCAAAGT; *MEN11a*-F: 5' CCAACCAGAAAACCTTGGG; *MEN11a*-R: 5' TGCTTCAGCCTCTCATAG TCA; *Mena*<sup>INV</sup>-F: 5' GATTCAAGACCATCAGGTTGTG; *Mena*<sup>INV</sup>-R: 5' TACATCGCAAATTA

GTGCTGTC; *PanMena-F*: 5' AGGCTGAAGCAGGACATTTT; *PanMena-R*: 5'  
TGCTCAGTTCCTGCCTGAT.

**Statistical analysis.** All results represent mean  $\pm$  s.d. as indicated. Data were analysed using Student's t-test or One-way analysis of variance (ANOVA), except where otherwise noted. Tumour volumes were compared using the Kruskal–Wallis test followed by the Mann–Whitney U test. All statistical analyses were performed using the Prism software package (PRISM 5.0; GraphPad Software, USA, 2007). Differences between groups were considered statistically significant when two-sided  $P < 0.05$ .

## Supplemented Figures

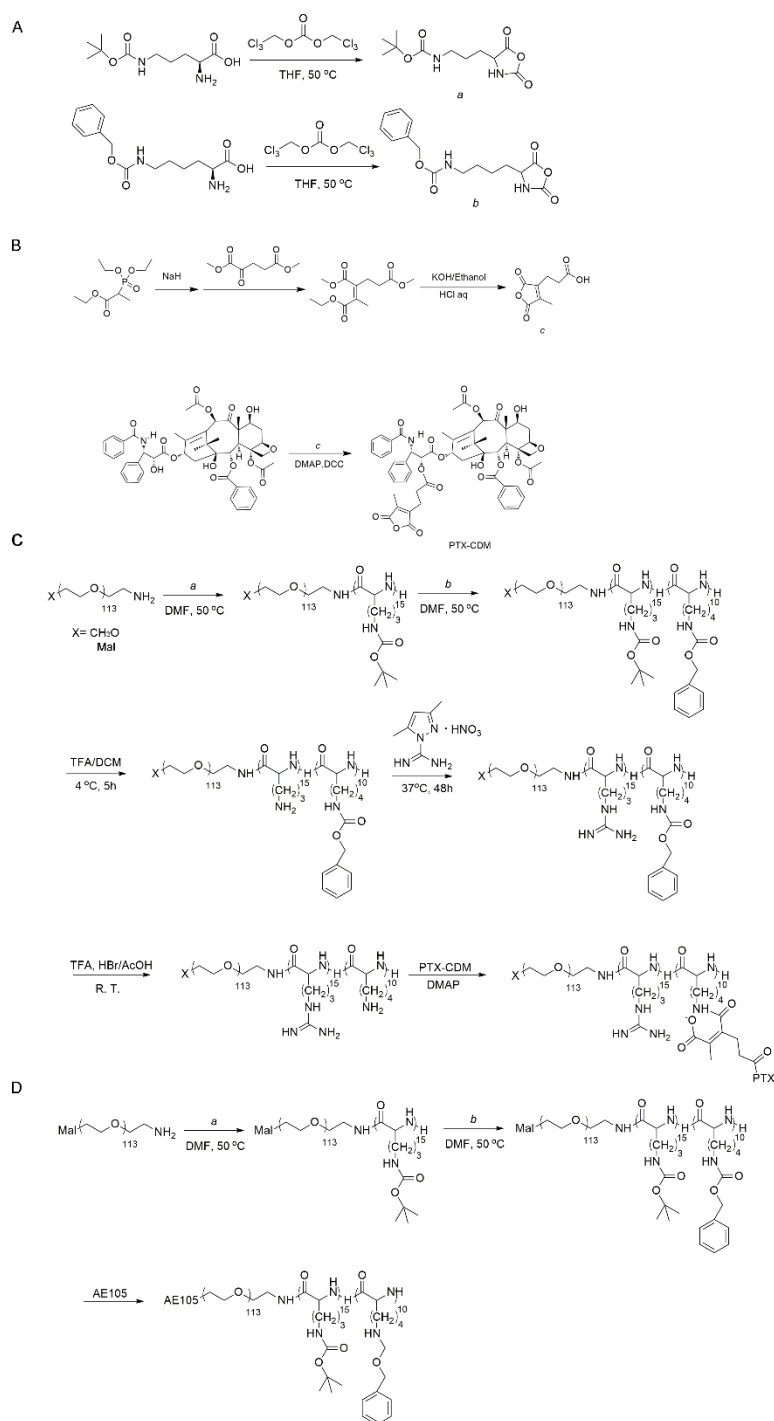

**Figure S1.** Synthesis route of AE105-PEG-pArg<sub>15</sub>-pLys<sub>10</sub>-CDM-PTX polymer. (A) The synthesis of Orn-(Boc)-NCA (upper) and Lys-(CBZ)-NCA (down). (B) The synthesis of CDM (upper) and PTX-CDM (down). (C) The synthesis of PEG-pArg<sub>15</sub>-pLys<sub>10</sub>-CDM-PTX polymer. (D) The synthesis of AE105-PEG-pOrn(Boc)<sub>15</sub>-pLys(CBZ)<sub>10</sub>.

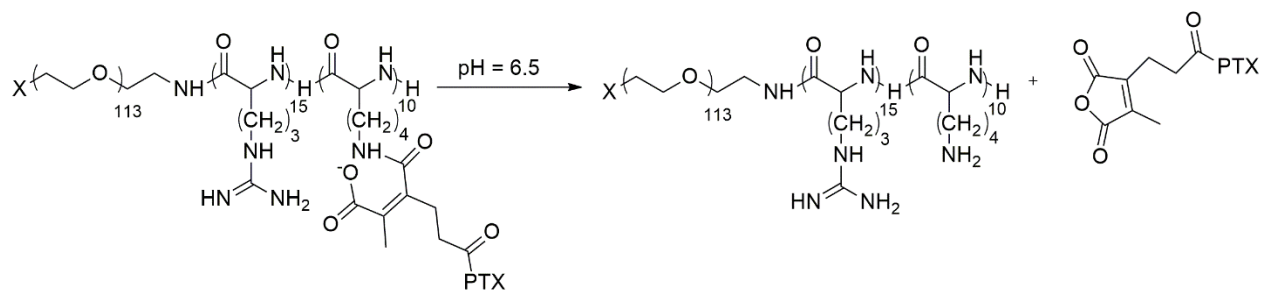

**Figure S2.** The pH sensitive mechanism of CDM.

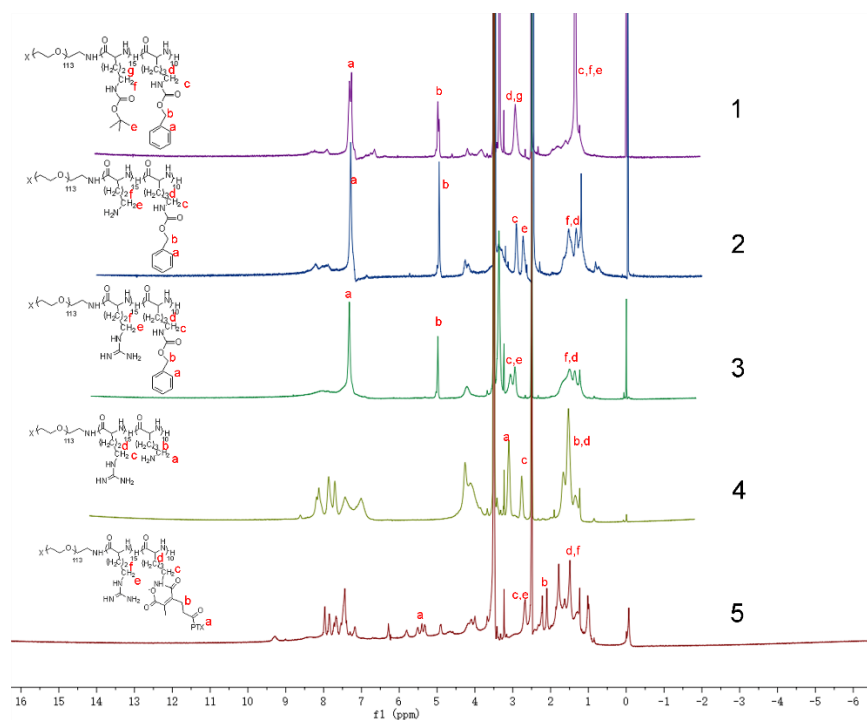

**Figure S3.** <sup>1</sup>H NMR spectrum of (1) PEG-pOrn(Boc)-pLys(Cbz), (2) PEG-pOrn-pLys(Cbz), (3) PEG-pArg-pLys(Cbz), (4) PEG-pArg-pLys and (5) PEG-pArg-pLys-PTX.

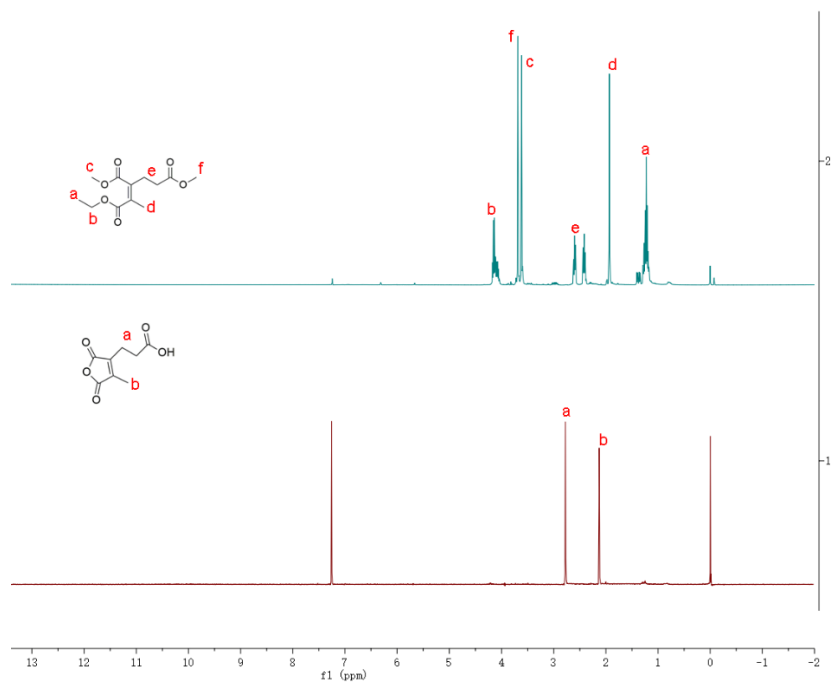

**Figure S4.** <sup>1</sup>H NMR spectrum of 3-pentene-1,3,4-tricarboxylic acid-4-ethyl-1,3-dimethyl ester (upper) and 2-propionic-3-methylmaleic anhydride (CDM, down).

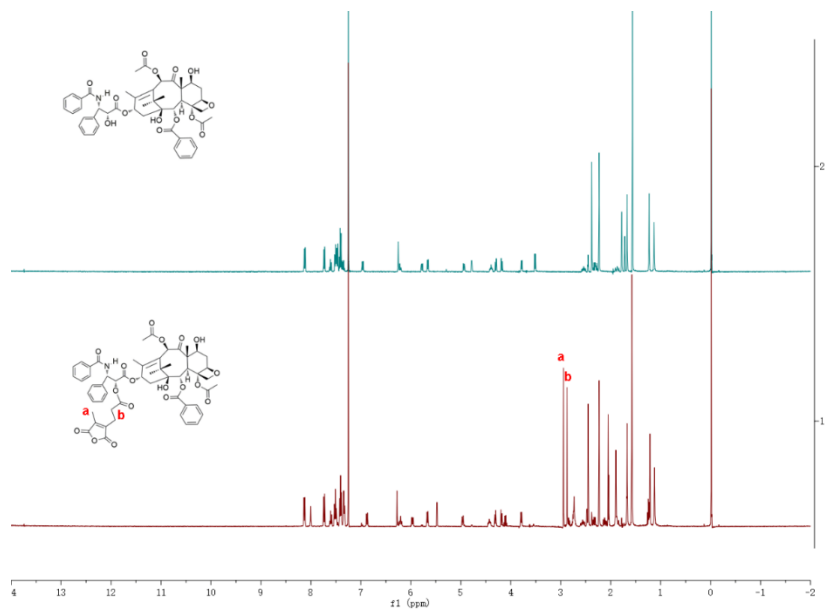

**Figure S5.** <sup>1</sup>H NMR spectrum of paclitaxel (upper) and paclitaxel-CDM (down).

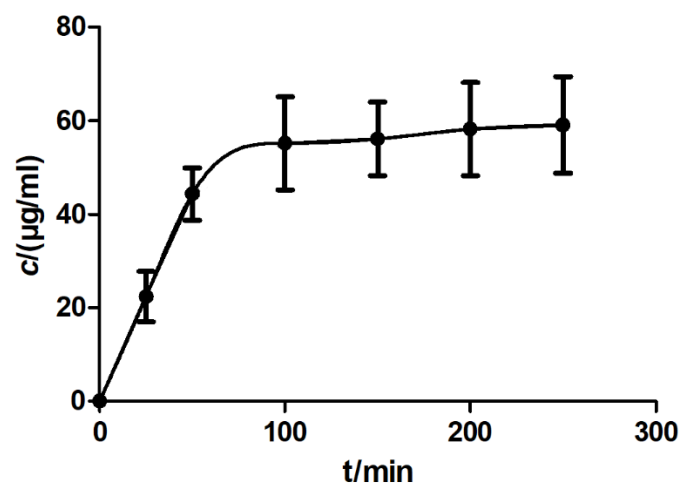

**Figure S6.** Concentration of p-GEM in PANC02 cells at different times.

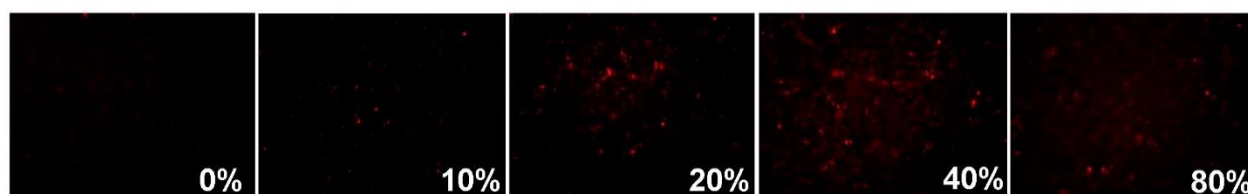

**Figure S7.** *In vitro* targeting effect of T-RKP in different AE105 modification rate. Red: T-RKP.

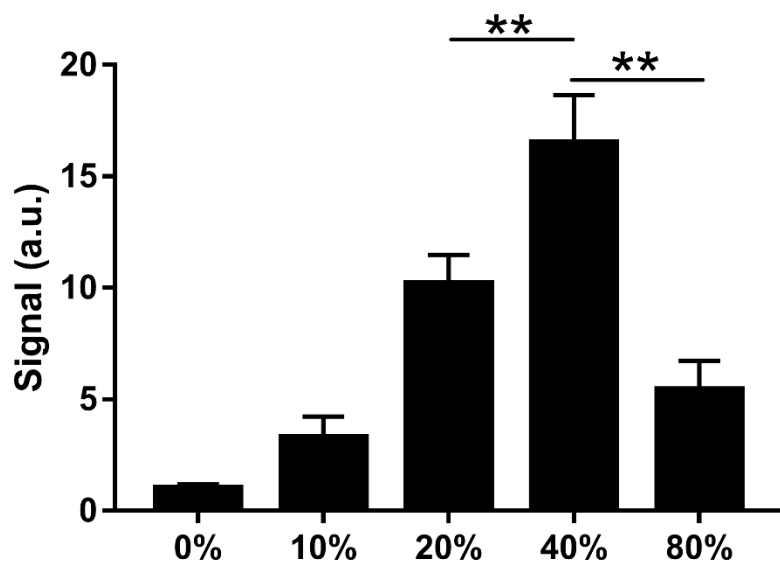

**Figure S8.** Statistic results of the targeting effect of T-RKP in different AE105 modification rates. Data represent means  $\pm$  s.d. (n = 10). \*\*P < 0.01.



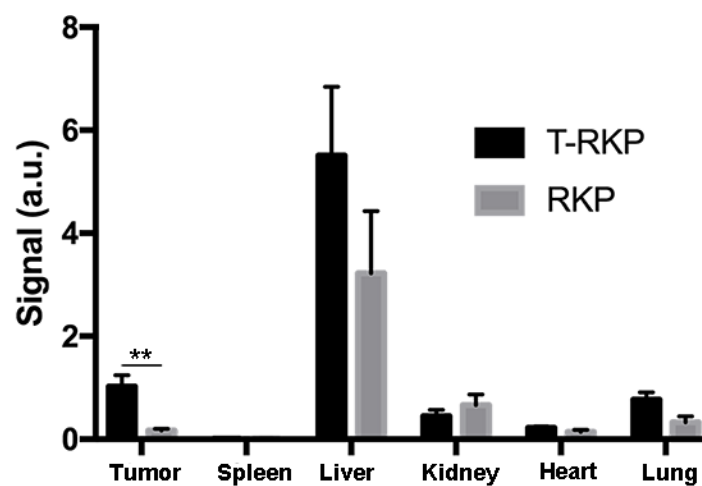

**Figure S9.** Statistic results of T-RKP or RKP signal in different organs. Data represent means  $\pm$  s.d. (n = 6). \*\*P < 0.01.

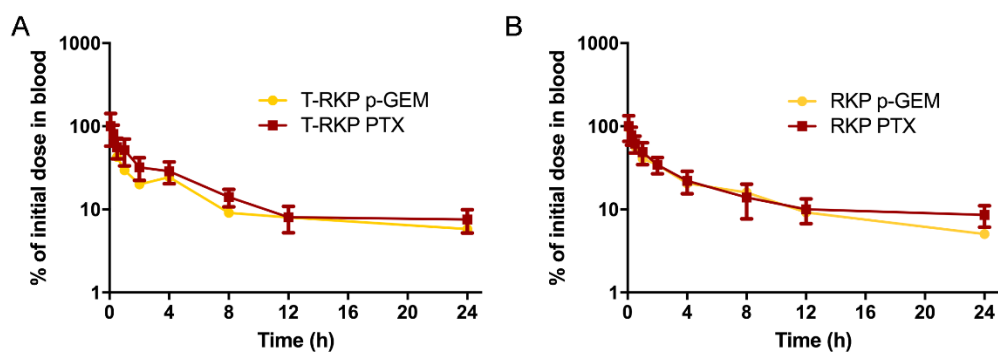

**Figure S10.** (A) Pharmacokinetics profile of p-GEM and PTX in T-RKP treated groups. (B) Pharmacokinetics profile of p-GEM and PTX in RKP treated groups. n.s. represents non-significance.

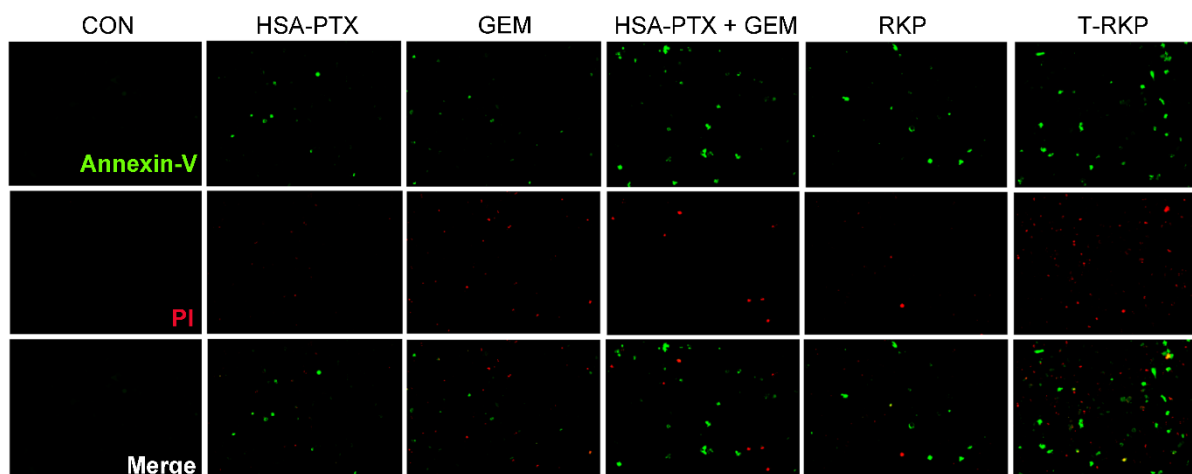

**Figure S11.** Annexin-V/PI assay after different treatments in MiaPaCa-2 cell. The green signal indicates the annexin-V signal, and the red signal indicates the PI signal. Original magnification = 200. Data represent the means  $\pm$  s.d. (n = 6).

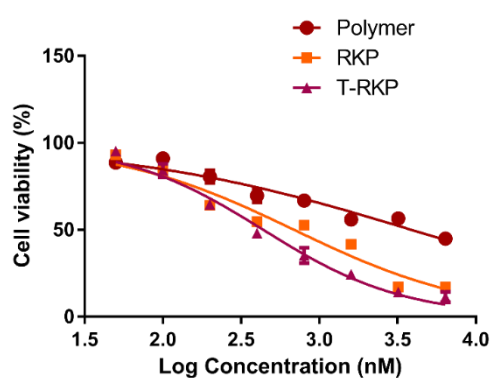

**Figure S12.** MTT assays in MiaPaCa-2 cells (different polymer concentration) in the polymer, RKP and T-RKP treated group.

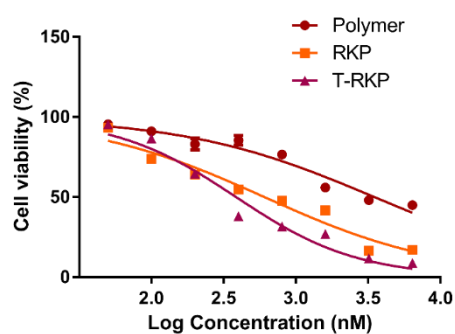

**Figure S13.** MTT assays in PANC02 cells (different polymer concentrations) in the polymer, RKP and T-RKP treated group.

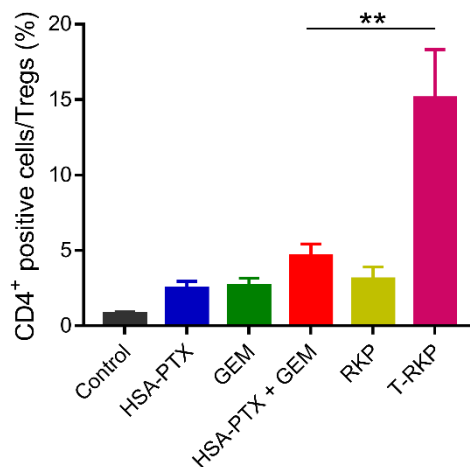

**Figure S14.** The ratios of CD4 positive cells in different groups with Tregs. Data represent means  $\pm$  s.d. (n = 6). \*\*P < 0.01.

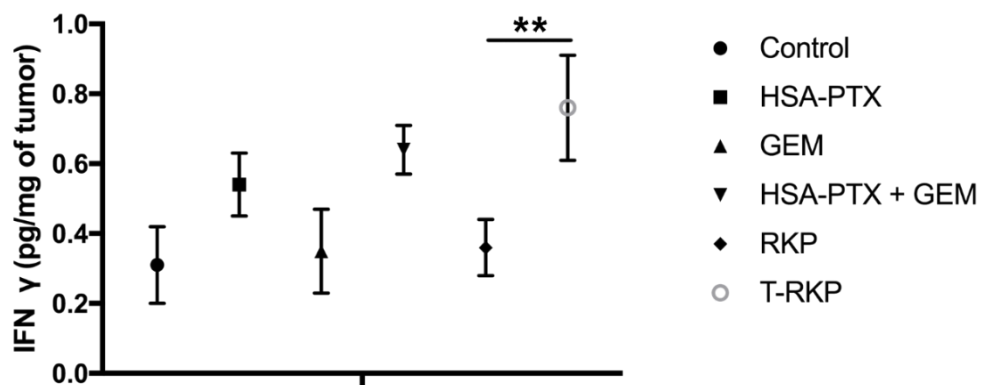

**Figure S15.** Expression of IFN- $\gamma$  in tumor after different treatments. Data represent means  $\pm$  s.d. (n = 6). \*P < 0.05, \*\*P < 0.01.

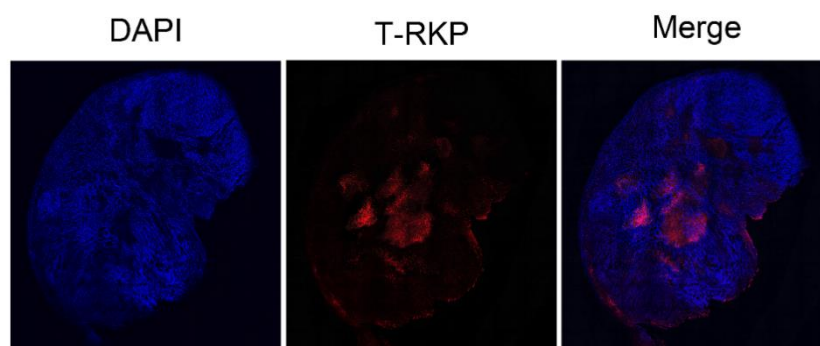

**Figure S16.** The distribution of T-RKP in pancreatic bearing mice. Red: T-RKP. Blue: DAPI.

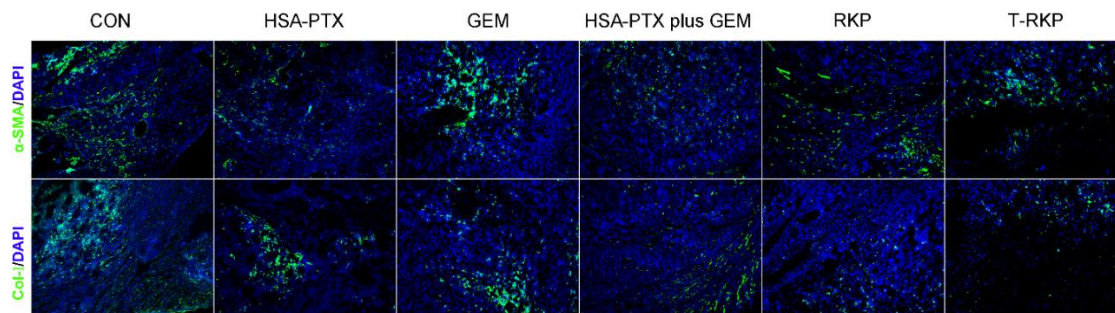

**Figure S17.** Tumor slices were immunostained for  $\alpha$ -SMA (green, upper) and Col-I (green, down) and DAPI (blue) for nuclear staining. Original magnification = 200.

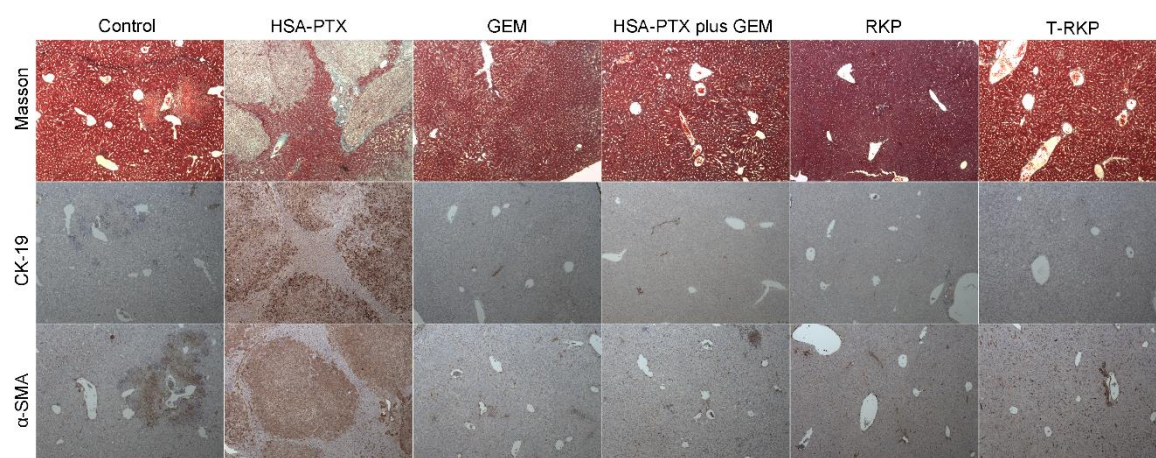

**Figure S18.** Liver were stained for masson staining (upper),  $\alpha$ -SMA staining (middle) and CK-19 (down) after different treatments.



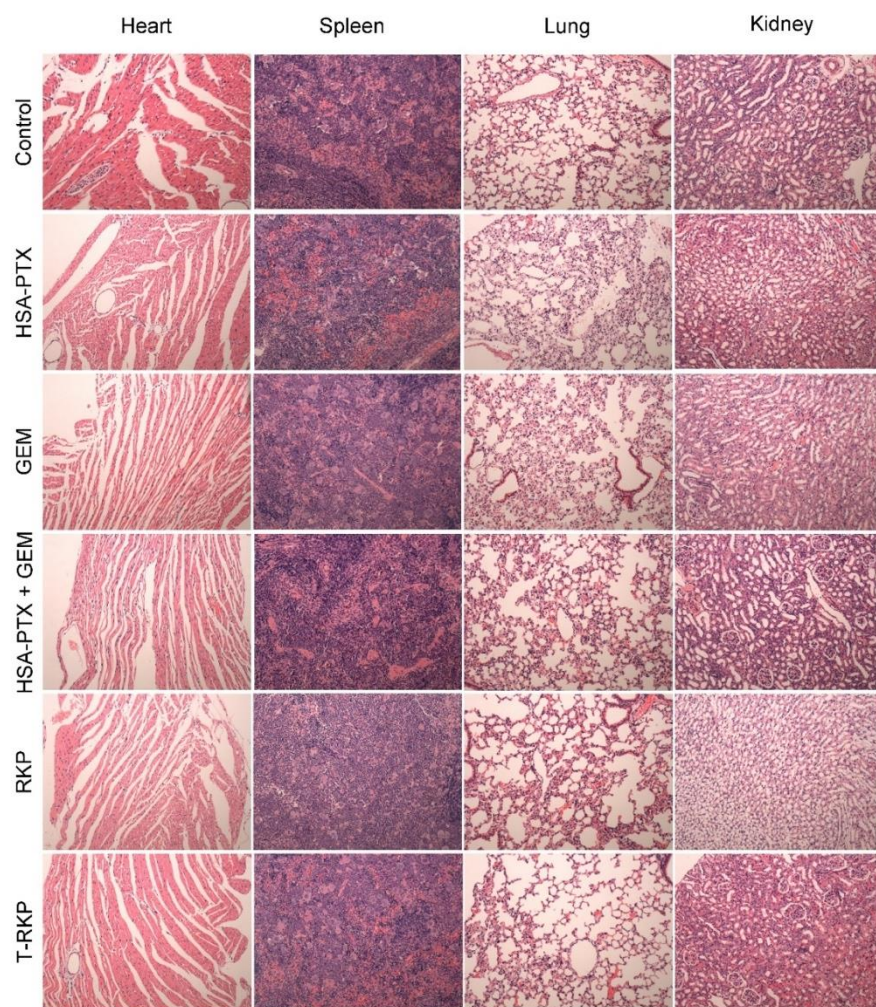

**Figure S19.** H&E staining images of the heart, spleen, lung and kidney after one-month treatment.

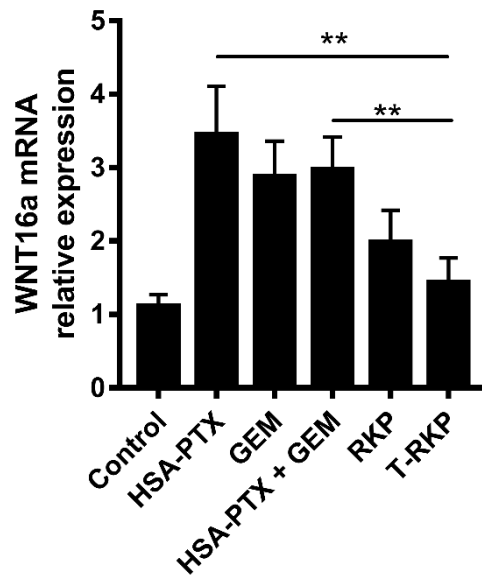

**Figure S20.** The gene expression of WNT16a in the tumor outer tissue after different treatments (Saline, HSA-PTX, GEM, HSA-PTX + GEM, RKP and T-RKP).

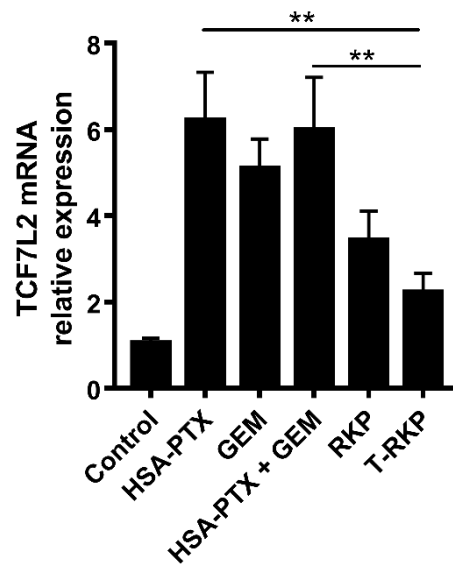

**Figure S21.** The gene expression of TCF7L2 in the tumor outer tissue after different treatments (Saline, HSA-PTX, GEM, HSA-PTX + GEM, RKP and T-RKP).

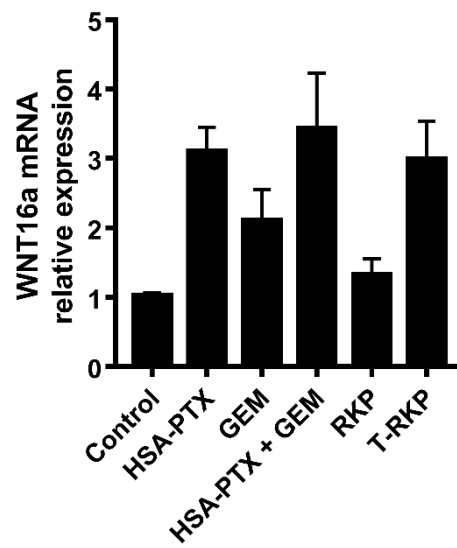

**Figure S22.** The gene expression of WNT16a in the tumor core after different treatments (Saline, HSA-PTX, GEM, HSA-PTX + GEM, RKP and T-RKP).

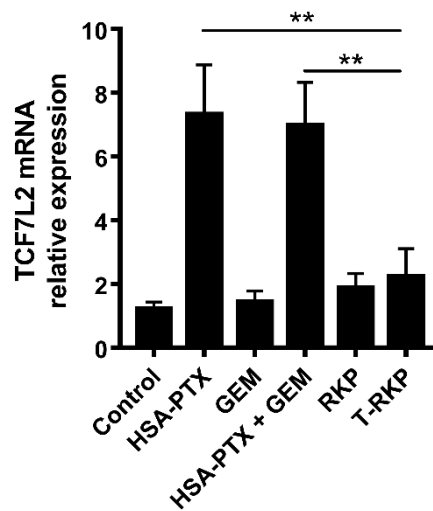

**Figure S23.** The gene expression of TCF7L2 in the tumor core after different treatments (Saline, HSA-PTX, GEM, HSA-PTX + GEM, RKP and T-RKP).

**Table S1. Summary of micelle properties.**

| Polymeric micelles | Size [ <i>d</i> , nm] | PDI         | Zeta potential [mV] | p-DL% <sup>a)</sup> | g-DL% <sup>a)</sup> |
|--------------------|-----------------------|-------------|---------------------|---------------------|---------------------|
| T-RKP              | 65.5 ± 4.3            | 0.08 ± 0.01 | 2.31 ± 0.28         | 26.3 ± 5.3%         | 8.6 ± 0.3%          |
| RKP                | 70.5 ± 3.2            | 0.06 ± 0.02 | 2.21 ± 0.33         | 28.8 ± 4.7%         | 7.7 ± 0.7%          |

<sup>a)</sup>Drug loading (DL%): ratio of encapsulated drug to the total mass of micelles. (p-DL: paclitaxel loading, g-DL: phosphorylated gemcitabine loading)

**Table S2. Pharmacokinetic parameters of different PTX formulations in SD rats at a dose of 15 mg/kg PTX. Data are presented as mean ± SD (n=6).**

|                             | HSA-PTX          | RKP               | T-RKP            |
|-----------------------------|------------------|-------------------|------------------|
| AUC <sub>0-∞</sub> (mg/L*h) | 187.334 ± 76.674 | 258.125 ± 118.663 | 227.334 ± 99.998 |
| MRT (h)                     | 11.357 ± 3.225   | 14.896 ± 4.485    | 13.449 ± 3.217   |
| Cl (L/h)                    | 0.055 ± 0.019    | 0.046 ± 0.014     | 0.049 ± 0.017    |
| t <sub>1/2</sub> (h)        | 8.593 ± 3.241    | 10.354 ± 3.892    | 10.115 ± 4.131   |

**Table S3. Pharmacokinetic parameters of different GEM or p-GEM formulations in SD rats at a dose of 5 mg/kg GEM or p-GEM. Data are presented as mean ± SD (n=6).**

|                             | Gem           | RKP             | T-RKP           |
|-----------------------------|---------------|-----------------|-----------------|
| AUC <sub>0-∞</sub> (mg/L*h) | 9.114 ± 2.576 | 45.339 ± 18.327 | 41.269 ± 13.431 |
| MRT (h)                     | 2.975 ± 0.764 | 8.332 ± 3.634   | 7.583 ± 2.216   |
| Cl (L/h)                    | 0.196 ± 0.058 | 0.073 ± 0.025   | 0.088 ± 0.031   |
| t <sub>1/2</sub> (h)        | 1.833 ± 0.441 | 5.132 ± 1.116   | 4.898 ± 1.433   |

**Table S4. IC<sub>50</sub> of different formulations based on PTX concentrations in PANC02 and MiaPaCa-2 cells.**

| IC <sub>50</sub> (nM) | PTX-HSA | PTX-HSA plus<br>GEM | RKP   | T-RKP |
|-----------------------|---------|---------------------|-------|-------|
| PANC02                | 199.7   | 227.6               | 466.3 | 142.3 |
| MiaPaCa-2             | 304.2   | 288.5               | 423.5 | 178.6 |

**Table S5. IC<sub>50</sub> of different formulations based on GEM concentrations in PANC02 and MiaPaCa-2 cells.**

| IC <sub>50</sub> (nM) | PTX-HSA | PTX-HSA plus<br>GEM | RKP   | T-RKP |
|-----------------------|---------|---------------------|-------|-------|
| PANC02                | 514.3   | 163.4               | 246.5 | 93.2  |
| MiaPaCa-2             | 333.5   | 145.3               | 311.2 | 129.6 |

## References:



- (1) Wang, S.; Gong, G.; Su, H.; Liu, W.; Wang, Z.; Li, L. *Polym Chem.* **2014**, *5*, 4871-4.
- (2) Wang, W.; Huang, Y.; Zhao, S.; Shao, T.; Cheng, Y. *Chem Commun.* **2013**, *49*, 2234-36.
- (3) Barrett, SE.; Burke, RS.; Abrams, MT.; Bason, C.; Busuck, M.; Carlini, E.; Carr, B. A.; Crocker, LS.; Fan, H.; Garbaccio, RM. *J Control Release.* **2014**, *183*, 124-37.
- (4) Guo, Y.; Zhang, Y.; Li, J.; Zhang, Y.; Lu, Y.; Jiang, X.; He, X.; Ma, H.; An, S.; Jiang, C. *Acs Appl Mater Interfaces.* **2015**, *7*, 5444-53.
